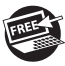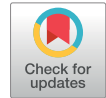

## Issues and Events

### PROFESSIONAL EDUCATION

The American Diabetes Association offers a variety of continuing education opportunities and materials for health care professionals. Educational offerings include live and free online programs. For more information, including a complete list of American Diabetes Association programs, please visit [professional.diabetes.org/ce](http://professional.diabetes.org/ce).

### SCIENTIFIC SESSIONS

The 79th annual American Diabetes Association Scientific Sessions will be held in San Francisco, California, on 7–11 June 2019, at the Moscone Center. The largest of its kind, this meeting brings together scientists and health care professionals from around the world who are involved in diabetes research and care. Attendees choose from over 3,000 original presentations given by leading experts in the field. For more information, please visit [scientificsessions.diabetes.org](http://scientificsessions.diabetes.org).

### 34th ANNUAL CLINICAL CONFERENCE ON DIABETES

The 34th Annual Clinical Conference on Diabetes will be held in Orlando, Florida, on 23–26 May 2019 at the Hyatt Regency Orlando. It will provide a comprehensive update on the treatment of diabetes, cardiovascular disease, obesity, and comorbidities. The ADA Clinical Conference is developed specifically to provide current clinical information utilizing different teaching methods, including didactic general sessions and small-group, interactive learning opportunities. For more information, please visit [professional.diabetes.org/ce](http://professional.diabetes.org/ce).

### DIABETES STANDARDS OF CARE 2019 WEBCAST

Presented by William T. Cefalu, MD, Chief Scientific, Medical & Mission Officer of the American Diabetes Association, this webcast presents the key updates and highlights from the

*Standards of Medical Care in Diabetes—2019*. To access the webcast, please visit [professional.diabetes.org/SOC](http://professional.diabetes.org/SOC).

### STANDARDS OF MEDICAL CARE IN DIABETES—2019

American Diabetes Association “Standards of Medical Care in Diabetes” are based on a complete review of the relevant literature by a diverse group of highly trained clinicians and researchers. After weighing the quality of evidence, from rigorous double-blind clinical trials to expert opinion, recommendations are drafted, reviewed, and submitted for approval to the American Diabetes Association Executive Committee. To see the 2019 Standards, please visit [professional.diabetes.org/SOC](http://professional.diabetes.org/SOC).

### DIABETES CORE UPDATE PODCASTS

*Diabetes Core Update* is a monthly audio podcast devoted to presenting and discussing the latest clinically relevant articles from the American Diabetes Association’s scholarly journals. *Diabetes Core Update* audio podcasts are free and can be accessed through iTunes or RSS feed. For more information, please visit [diabetesjournals.org/content/diabetes-core-update-podcasts](http://diabetesjournals.org/content/diabetes-core-update-podcasts).

### PATHWAY TO STOP DIABETES CALL FOR NOMINATIONS

The American Diabetes Association is pleased to open the Call for Nominations for Pathway to Stop Diabetes Awards. Pathway provides substantial support to exceptional scientists who are early in their diabetes research careers or who are established in other disciplines but are interested in applying their expertise to diabetes research. Applications are due by 2 July 2019. For more information, please visit [diabetes.org/pathway](http://diabetes.org/pathway).

*Diabetes Care* (print ISSN 0149-5992, online ISSN 1935-5548) is owned, controlled, and published monthly by the American Diabetes Association, Inc., 2451 Crystal Drive, Suite 900, Arlington, VA 22202. *Diabetes Care* is a registered trademark of the American Diabetes Association. **Periodicals postage** paid at Arlington, VA, and additional mailing offices. **POSTMASTER:** Send address changes to *Diabetes Care*, American Diabetes Association, Inc., Journal Subscriptions, 2451 Crystal Drive, Suite 900, Arlington, VA 22202. Claims for missing issues should be made within 6 months of publication. The publisher expects to supply missing issues free of charge only when losses have been sustained in transit and when the reserve stock permits.
